# Supplementary material for: A DNA methylation signature identified in the buccal mucosa reflecting active tuberculosis is changing during tuberculosis treatment
Source: PubMed Central journal article supplement (PMC11604703; doi:10.1038/s41598-024-80570-4), 2024-11-28
Supplement: 41598_2024_80570_MOESM2_ESM.pdf [file 41598_2024_80570_MOESM2_ESM.pdf]

## **A DNA methylation signature identified in the buccal mucosa reflecting active tuberculosis is changed during tuberculosis treatment**

Isabelle Öhrnberg<sup>1†</sup>, Lovisa Karlsson<sup>1†</sup>, Shumaila Sayyab<sup>1</sup>, Jakob Paues<sup>1,2</sup>, Patricia Espinoza-Lopez<sup>3,4</sup>, Melissa Méndez-Aranda<sup>5</sup>, Ericka Meza<sup>4</sup>, Cesar Ugarte-Gil<sup>3,4,6</sup>, Nicholas Kiprotich<sup>7,8</sup>, Lameck Diero<sup>8,9</sup>, Ronald Tonui<sup>8,10</sup>, Maria Lerm<sup>1\*</sup>

<sup>1</sup>Division of Inflammation and Infection, <sup>2</sup>Division of Infectious Diseases, Department of Biomedical and Clinical Sciences, Faculty of Medicine and Health Sciences, Linköping University, Linköping, Sweden, <sup>3</sup>Facultad de Medicina, <sup>4</sup>Instituto de Medicina Tropical Alexander Von Humboldt, <sup>5</sup>Laboratorios de Investigación y Desarrollo, Facultad de Ciencias e Ingeniería, Universidad Peruana Cayetano Heredia, Lima, Peru, <sup>6</sup>Department of Epidemiology, School of Public and Population Health, University of Texas Medical Branch Galveston, Texas, USA, <sup>7</sup>Biochemistry and Clinical chemistry <sup>8</sup>AMPATH Kenya, <sup>9</sup>Department of Medicine, <sup>10</sup>Department of Pathology, Moi University Eldoret, Kenya

†) Isabelle Öhrnberg and Lovisa Karlsson contributed equally to this work

**Supplementary list 1.** Differentially methylated CpG sites (MMD >0.2 and p. adj <0.05) identified between active TB patients and controls in Peruvian pilot cohort were used in a disease module detection algorithm (DIAMOND) and further a pathway enrichment analysis using KEGG. All significantly enriched pathway are listed.

| <b>ID</b> | <b>Description</b>                                | <b>GeneRatio</b> | <b>p.adjust</b>      |
|-----------|---------------------------------------------------|------------------|----------------------|
| hsa04151  | PI3K-Akt signaling pathway                        | 85/308           | 1.15632993171775e-46 |
| hsa04010  | MAPK signaling pathway                            | 72/308           | 5.10420914334416e-40 |
| hsa04014  | Ras signaling pathway                             | 70/308           | 4.82679363921646e-45 |
| hsa04510  | Focal adhesion                                    | 68/308           | 1.94844161830656e-47 |
| hsa04015  | Rap1 signaling pathway                            | 65/308           | 5.41774865687103e-43 |
| hsa04810  | Regulation of actin cytoskeleton                  | 65/308           | 1.36380257372309e-40 |
| hsa05135  | Yersinia infection                                | 44/308           | 1.68917246562465e-29 |
| hsa05205  | Proteoglycans in cancer                           | 44/308           | 5.49763476513073e-22 |
| hsa04360  | Axon guidance                                     | 43/308           | 6.36287241080503e-23 |
| hsa05165  | Human papillomavirus infection                    | 42/308           | 1.30309086146068e-12 |
| hsa04062  | Chemokine signaling pathway                       | 38/308           | 1.25199103353272e-17 |
| hsa05131  | Shigellosis                                       | 38/308           | 5.00778346117786e-14 |
| hsa04722  | Neurotrophin signaling pathway                    | 37/308           | 3.00759632281405e-24 |
| hsa05132  | Salmonella infection                              | 37/308           | 3.2335969120482e-13  |
| hsa04020  | Calcium signaling pathway                         | 36/308           | 2.2014805627574e-12  |
| hsa05206  | MicroRNAs in cancer                               | 36/308           | 7.25117389777283e-10 |
| hsa04660  | T cell receptor signaling pathway                 | 35/308           | 7.91543743197193e-22 |
| hsa01521  | EGFR tyrosine kinase inhibitor resistance         | 34/308           | 1.52221300095771e-27 |
| hsa04012  | ErbB signaling pathway                            | 34/308           | 2.59728209329829e-26 |
| hsa05170  | Human immunodeficiency virus 1 infection          | 34/308           | 3.35194472189026e-13 |
| hsa05163  | Human cytomegalovirus infection                   | 34/308           | 1.89179292211814e-12 |
| hsa05226  | Gastric cancer                                    | 33/308           | 6.75300661010171e-17 |
| hsa05224  | Breast cancer                                     | 32/308           | 3.51397290952783e-16 |
| hsa04072  | Phospholipase D signaling pathway                 | 32/308           | 4.17664681172176e-16 |
| hsa05218  | Melanoma                                          | 31/308           | 3.89380885838785e-25 |
| hsa04666  | Fc gamma R-mediated phagocytosis                  | 31/308           | 9.70027613602581e-21 |
| hsa05231  | Choline metabolism in cancer                      | 31/308           | 1.28344439336814e-20 |
| hsa04935  | Growth hormone synthesis, secretion and action    | 31/308           | 1.0253494242708e-17  |
| hsa04910  | Insulin signaling pathway                         | 31/308           | 3.51397290952783e-16 |
| hsa05130  | Pathogenic Escherichia coli infection             | 31/308           | 1.29331649370283e-11 |
| hsa05208  | Chemical carcinogenesis - reactive oxygen species | 31/308           | 2.06130879253116e-10 |
| hsa04650  | Natural killer cell mediated cytotoxicity         | 30/308           | 1.49366180242902e-15 |
| hsa05167  | Kaposi sarcoma-associated herpesvirus infection   | 30/308           | 2.75300877328688e-11 |
| hsa05100  | Bacterial invasion of epithelial cells            | 28/308           | 1.75762956908535e-20 |
| hsa01522  | Endocrine resistance                              | 28/308           | 2.17374841306667e-17 |
| hsa05161  | Hepatitis B                                       | 28/308           | 8.49175971584006e-12 |
| hsa04926  | Relaxin signaling pathway                         | 27/308           | 2.22916689743612e-13 |
| hsa04380  | Osteoclast differentiation                        | 27/308           | 1.91174677543696e-12 |
| hsa05207  | Chemical carcinogenesis - receptor activation     | 27/308           | 2.1560709696495e-08  |
| hsa05417  | Lipid and atherosclerosis                         | 27/308           | 2.35523182619437e-08 |

|          |                                                        |        |                      |
|----------|--------------------------------------------------------|--------|----------------------|
| hsa05211 | Renal cell carcinoma                                   | 26/308 | 1.78608129409408e-19 |
| hsa04613 | Neutrophil extracellular trap formation                | 26/308 | 8.75076387093876e-09 |
| hsa05166 | Human T-cell leukemia virus 1 infection                | 26/308 | 1.77218152959365e-07 |
| hsa04024 | cAMP signaling pathway                                 | 26/308 | 2.30127047537319e-07 |
| hsa04662 | B cell receptor signaling pathway                      | 25/308 | 2.47096822151896e-15 |
| hsa04933 | AGE-RAGE signaling pathway in diabetic complications   | 25/308 | 3.00793798517917e-14 |
| hsa04664 | Fc epsilon RI signaling pathway                        | 24/308 | 2.81179791211463e-17 |
| hsa04917 | Prolactin signaling pathway                            | 24/308 | 5.80534308721971e-17 |
| hsa05210 | Colorectal cancer                                      | 24/308 | 8.14851066746316e-15 |
| hsa05235 | PD-L1 expression and PD-1 checkpoint pathway in cancer | 24/308 | 1.79126968179211e-14 |
| hsa05215 | Prostate cancer                                        | 24/308 | 1.30038903857265e-13 |
| hsa04670 | Leukocyte transendothelial migration                   | 24/308 | 5.58490373770724e-12 |
| hsa05418 | Fluid shear stress and atherosclerosis                 | 24/308 | 3.81010289544489e-10 |
| hsa04140 | Autophagy - animal                                     | 24/308 | 1.39554355441419e-08 |
| hsa05010 | Alzheimer disease                                      | 24/308 | 0.00943593473348421  |
| hsa05214 | Glioma                                                 | 23/308 | 3.54187664598409e-15 |
| hsa04150 | mTOR signaling pathway                                 | 23/308 | 1.81000267156629e-08 |
| hsa05230 | Central carbon metabolism in cancer                    | 22/308 | 8.46811533863156e-15 |
| hsa05220 | Chronic myeloid leukemia                               | 22/308 | 5.1106720202561e-14  |
| hsa04520 | Adherens junction                                      | 22/308 | 2.94930094582342e-12 |
| hsa04668 | TNF signaling pathway                                  | 22/308 | 4.38031746853701e-10 |
| hsa04071 | Sphingolipid signaling pathway                         | 22/308 | 7.03126503410542e-10 |
| hsa04068 | FoxO signaling pathway                                 | 22/308 | 3.71083408157919e-09 |
| hsa04932 | Non-alcoholic fatty liver disease                      | 22/308 | 7.26797590996929e-08 |
| hsa05225 | Hepatocellular carcinoma                               | 22/308 | 2.94920542347234e-07 |
| hsa05203 | Viral carcinogenesis                                   | 22/308 | 6.80448617632538e-06 |
| hsa05022 | Pathways of neurodegeneration - multiple diseases      | 22/308 | 0.18978424981308     |
| hsa04370 | VEGF signaling pathway                                 | 21/308 | 2.51589847943718e-15 |
| hsa04931 | Insulin resistance                                     | 21/308 | 5.18341766336943e-10 |
| hsa04611 | Platelet activation                                    | 21/308 | 6.45985766965227e-09 |
| hsa04210 | Apoptosis                                              | 21/308 | 2.78769708366302e-08 |
| hsa05169 | Epstein-Barr virus infection                           | 21/308 | 1.98506398644567e-05 |
| hsa05415 | Diabetic cardiomyopathy                                | 21/308 | 2.22631773532849e-05 |
| hsa04144 | Endocytosis                                            | 21/308 | 0.00041764352690289  |
| hsa05212 | Pancreatic cancer                                      | 20/308 | 5.1266515569579e-12  |
| hsa05222 | Small cell lung cancer                                 | 20/308 | 1.94267609154283e-10 |
| hsa04625 | C-type lectin receptor signaling pathway               | 20/308 | 1.71669983651337e-09 |
| hsa04659 | Th17 cell differentiation                              | 20/308 | 2.85833966355848e-09 |
| hsa05145 | Toxoplasmosis                                          | 20/308 | 4.53035748744337e-09 |
| hsa04148 | Efferocytosis                                          | 20/308 | 1.26545192910577e-06 |
| hsa05160 | Hepatitis C                                            | 20/308 | 1.68919722234753e-06 |

|          |                                                            |        |                      |
|----------|------------------------------------------------------------|--------|----------------------|
| hsa05152 | Tuberculosis                                               | 20/308 | 1.14516393204828e-05 |
| hsa04066 | HIF-1 signaling pathway                                    | 19/308 | 1.94782510871124e-08 |
| hsa04915 | Estrogen signaling pathway                                 | 19/308 | 9.22411008887775e-07 |
| hsa04218 | Cellular senescence                                        | 19/308 | 5.75821443820785e-06 |
| hsa04630 | JAK-STAT signaling pathway                                 | 19/308 | 1.52469163909484e-05 |
| hsa05223 | Non-small cell lung cancer                                 | 18/308 | 1.67712708925235e-10 |
| hsa04658 | Th1 and Th2 cell differentiation                           | 18/308 | 7.65144522347912e-09 |
| hsa05146 | Amoebiasis                                                 | 18/308 | 4.45983567018988e-08 |
| hsa04620 | Toll-like receptor signaling pathway                       | 18/308 | 1.07857285557854e-07 |
| hsa05171 | Coronavirus disease - COVID-19                             | 18/308 | 0.00326322257174331  |
| hsa05221 | Acute myeloid leukemia                                     | 17/308 | 4.38031746853701e-10 |
| hsa04512 | ECM-receptor interaction                                   | 17/308 | 2.85522277851357e-08 |
| hsa04912 | GnRH signaling pathway                                     | 17/308 | 5.5788249875776e-08  |
| hsa05142 | Chagas disease                                             | 17/308 | 2.54605180842845e-07 |
| hsa04550 | Signaling pathways regulating pluripotency of stem cells   | 17/308 | 2.50754369975954e-05 |
| hsa04530 | Tight junction                                             | 17/308 | 0.000199548072692529 |
| hsa05164 | Influenza A                                                | 17/308 | 0.00022883384902732  |
| hsa05020 | Prion disease                                              | 17/308 | 0.0305468952147918   |
| hsa05162 | Measles                                                    | 16/308 | 6.13128657180872e-05 |
| hsa05034 | Alcoholism                                                 | 16/308 | 0.00179438073335788  |
| hsa04930 | Type II diabetes mellitus                                  | 15/308 | 1.33717198335543e-10 |
| hsa05213 | Endometrial cancer                                         | 15/308 | 3.88698468307025e-09 |
| hsa04540 | Gap junction                                               | 15/308 | 1.62764450922355e-06 |
| hsa04914 | Progesterone-mediated oocyte maturation                    | 15/308 | 1.70484003058389e-05 |
| hsa04919 | Thyroid hormone signaling pathway                          | 15/308 | 5.05003824360643e-05 |
| hsa04820 | Cytoskeleton in muscle cells                               | 15/308 | 0.0284220064333507   |
| hsa04920 | Adipocytokine signaling pathway                            | 14/308 | 2.96887622613689e-07 |
| hsa05120 | Epithelial cell signaling in Helicobacter pylori infection | 14/308 | 3.54179564112437e-07 |
| hsa05133 | Pertussis                                                  | 14/308 | 1.18095869357747e-06 |
| hsa04750 | Inflammatory mediator regulation of TRP channels           | 14/308 | 1.98506398644567e-05 |
| hsa04921 | Oxytocin signaling pathway                                 | 14/308 | 0.00194397889620744  |
| hsa05140 | Leishmaniasis                                              | 13/308 | 5.96994248486519e-06 |
| hsa05412 | Arrhythmogenic right ventricular cardiomyopathy            | 13/308 | 1.98506398644567e-05 |
| hsa04211 | Longevity regulating pathway                               | 13/308 | 3.18088425891427e-05 |
| hsa05410 | Hypertrophic cardiomyopathy                                | 13/308 | 8.70369032026557e-05 |
| hsa05414 | Dilated cardiomyopathy                                     | 13/308 | 0.000159911574231215 |
| hsa04152 | AMPK signaling pathway                                     | 13/308 | 0.000684608249374517 |
| hsa04936 | Alcoholic liver disease                                    | 13/308 | 0.00305379881242509  |
| hsa05017 | Spinocerebellar ataxia                                     | 13/308 | 0.00305379881242509  |
| hsa05202 | Transcriptional misregulation in cancer                    | 13/308 | 0.0305468952147918   |
| hsa04064 | NF-kappa B signaling pathway                               | 12/308 | 0.000615374154298498 |

|          |                                                     |        |                      |
|----------|-----------------------------------------------------|--------|----------------------|
| hsa04725 | Cholinergic synapse                                 | 12/308 | 0.00136783438527749  |
| hsa04928 | Parathyroid hormone synthesis, secretion and action | 12/308 | 0.00136783438527749  |
| hsa04270 | Vascular smooth muscle contraction                  | 12/308 | 0.00480247266837948  |
| hsa04371 | Apelin signaling pathway                            | 12/308 | 0.00680167454754356  |
| hsa04022 | cGMP-PKG signaling pathway                          | 12/308 | 0.0242885314119625   |
| hsa04714 | Thermogenesis                                       | 12/308 | 0.18978424981308     |
| hsa04213 | Longevity regulating pathway - multiple species     | 11/308 | 2.05584035433715e-05 |
| hsa04657 | IL-17 signaling pathway                             | 11/308 | 0.000957731777169636 |
| hsa04916 | Melanogenesis                                       | 11/308 | 0.00158085626218277  |
| hsa04137 | Mitophagy - animal                                  | 11/308 | 0.00212224871387845  |
| hsa04723 | Retrograde endocannabinoid signaling                | 11/308 | 0.0273512474435213   |
| hsa04514 | Cell adhesion molecules                             | 11/308 | 0.0368354498103312   |
| hsa04621 | NOD-like receptor signaling pathway                 | 11/308 | 0.110577510442625    |
| hsa05219 | Bladder cancer                                      | 10/308 | 2.79274902228893e-06 |
| hsa04929 | GnRH secretion                                      | 10/308 | 0.000174482183912537 |
| hsa05416 | Viral myocarditis                                   | 10/308 | 0.000285364476099354 |
| hsa04640 | Hematopoietic cell lineage                          | 10/308 | 0.00454059766390379  |
| hsa04728 | Dopaminergic synapse                                | 10/308 | 0.0299977815059351   |
| hsa04310 | Wnt signaling pathway                               | 10/308 | 0.136499065180674    |
| hsa05016 | Huntington disease                                  | 10/308 | 0.828035323816674    |
| hsa04730 | Long-term depression                                | 9/308  | 0.000467093292943326 |
| hsa04070 | Phosphatidylinositol signaling system               | 9/308  | 0.0133145684843156   |
| hsa04726 | Serotonergic synapse                                | 9/308  | 0.0328709256471157   |
| hsa04145 | Phagosome                                           | 9/308  | 0.159115055656215    |
| hsa05014 | Amyotrophic lateral sclerosis                       | 9/308  | 0.96823632820802     |
| hsa05216 | Thyroid cancer                                      | 8/308  | 7.70507632848456e-05 |
| hsa04960 | Aldosterone-regulated sodium reabsorption           | 8/308  | 9.29570016044916e-05 |
| hsa04923 | Regulation of lipolysis in adipocytes               | 8/308  | 0.00194397889620744  |
| hsa04622 | RIG-I-like receptor signaling pathway               | 8/308  | 0.00669837529976552  |
| hsa01524 | Platinum drug resistance                            | 8/308  | 0.00850432476222206  |
| hsa05323 | Rheumatoid arthritis                                | 8/308  | 0.029696571431958    |
| hsa04114 | Oocyte meiosis                                      | 8/308  | 0.18070424876283     |
| hsa05322 | Systemic lupus erythematosus                        | 8/308  | 0.18070424876283     |
| hsa04261 | Adrenergic signaling in cardiomyocytes              | 8/308  | 0.262894884326332    |
| hsa04934 | Cushing syndrome                                    | 8/308  | 0.267848223342505    |
| hsa04390 | Hippo signaling pathway                             | 8/308  | 0.279419837013711    |
| hsa04217 | Necroptosis                                         | 8/308  | 0.289450003355871    |
| hsa05340 | Primary immunodeficiency                            | 7/308  | 0.000639913101083007 |
| hsa04720 | Long-term potentiation                              | 7/308  | 0.0158701040030047   |
| hsa04350 | TGF-beta signaling pathway                          | 7/308  | 0.136499065180674    |
| hsa05012 | Parkinson disease                                   | 7/308  | 0.947440322539008    |
| hsa04060 | Cytokine-cytokine receptor interaction              | 7/308  | 0.96823632820802     |
| hsa05144 | Malaria                                             | 6/308  | 0.0140888060524997   |

|          |                                                               |       |                    |
|----------|---------------------------------------------------------------|-------|--------------------|
| hsa00562 | Inositol phosphate metabolism                                 | 6/308 | 0.0704582313998889 |
| hsa04713 | Circadian entrainment                                         | 6/308 | 0.192262627108512  |
| hsa04724 | Glutamatergic synapse                                         | 6/308 | 0.320426139168782  |
| hsa05143 | African trypanosomiasis                                       | 5/308 | 0.0161744495298583 |
| hsa04940 | Type I diabetes mellitus                                      | 5/308 | 0.0293367139703719 |
| hsa04973 | Carbohydrate digestion and absorption                         | 5/308 | 0.0583817584081621 |
| hsa04115 | p53 signaling pathway                                         | 5/308 | 0.190118328463184  |
| hsa04061 | Viral protein interaction with cytokine and cytokine receptor | 5/308 | 0.397647130794388  |
| hsa05150 | Staphylococcus aureus infection                               | 5/308 | 0.397647130794388  |
| hsa04215 | Apoptosis - multiple species                                  | 4/308 | 0.0416810139066413 |
| hsa05330 | Allograft rejection                                           | 4/308 | 0.0714102309357052 |
| hsa05332 | Graft-versus-host disease                                     | 4/308 | 0.110577510442625  |
| hsa05134 | Legionellosis                                                 | 4/308 | 0.20383319906      |
| hsa05321 | Inflammatory bowel disease                                    | 4/308 | 0.289450003355871  |
| hsa04610 | Complement and coagulation cascades                           | 4/308 | 0.53106950690357   |
| hsa04727 | GABAergic synapse                                             | 4/308 | 0.537059993618289  |
| hsa05032 | Morphine addiction                                            | 4/308 | 0.556794509967911  |
| hsa04925 | Aldosterone synthesis and secretion                           | 4/308 | 0.625025289764458  |
| hsa04972 | Pancreatic secretion                                          | 4/308 | 0.685599905210756  |
| hsa00230 | Purine metabolism                                             | 4/308 | 0.828084542483679  |
| hsa04110 | Cell cycle                                                    | 4/308 | 0.936765990237965  |
| hsa04141 | Protein processing in endoplasmic reticulum                   | 4/308 | 0.950272649906944  |
| hsa04814 | Motor proteins                                                | 4/308 | 0.972465099568449  |
| hsa03040 | Spliceosome                                                   | 4/308 | 0.981475548710786  |
| hsa01523 | Antifolate resistance                                         | 3/308 | 0.139992329211903  |
| hsa04672 | Intestinal immune network for IgA production                  | 3/308 | 0.3630825051       |
| hsa05030 | Cocaine addiction                                             | 3/308 | 0.3630825051       |
| hsa05320 | Autoimmune thyroid disease                                    | 3/308 | 0.412729470082765  |
| hsa05031 | Amphetamine addiction                                         | 3/308 | 0.609723289496843  |
| hsa04918 | Thyroid hormone synthesis                                     | 3/308 | 0.67214019063952   |
| hsa03320 | PPAR signaling pathway                                        | 3/308 | 0.680770978322578  |
| hsa03083 | Polycomb repressive complex                                   | 3/308 | 0.743207549010573  |
| hsa04911 | Insulin secretion                                             | 3/308 | 0.771680648511339  |
| hsa00190 | Oxidative phosphorylation                                     | 3/308 | 0.959764352415589  |
| hsa04120 | Ubiquitin mediated proteolysis                                | 3/308 | 0.961421559236353  |
| hsa04080 | Neuroactive ligand-receptor interaction                       | 3/308 | 0.999998748277511  |
| hsa04136 | Autophagy - other                                             | 2/308 | 0.448792356258077  |
| hsa04913 | Ovarian steroidogenesis                                       | 2/308 | 0.717882636224667  |
| hsa04340 | Hedgehog signaling pathway                                    | 2/308 | 0.774517565697476  |
| hsa01212 | Fatty acid metabolism                                         | 2/308 | 0.783398945835448  |
| hsa04330 | Notch signaling pathway                                       | 2/308 | 0.823226962085645  |
| hsa00561 | Glycerolipid metabolism                                       | 2/308 | 0.828084542483679  |
| hsa04927 | Cortisol synthesis and secretion                              | 2/308 | 0.828084542483679  |

|          |                                                           |       |                   |
|----------|-----------------------------------------------------------|-------|-------------------|
| hsa04924 | Renin secretion                                           | 2/308 | 0.861726215001291 |
| hsa04971 | Gastric acid secretion                                    | 2/308 | 0.907121830237529 |
| hsa04721 | Synaptic vesicle cycle                                    | 2/308 | 0.92586617155262  |
| hsa04623 | Cytosolic DNA-sensing pathway                             | 2/308 | 0.93267148689231  |
| hsa04260 | Cardiac muscle contraction                                | 2/308 | 0.936765990237965 |
| hsa04970 | Salivary secretion                                        | 2/308 | 0.955142237496484 |
| hsa00564 | Glycerophospholipid metabolism                            | 2/308 | 0.959764352415589 |
| hsa04922 | Glucagon signaling pathway                                | 2/308 | 0.96823632820802  |
| hsa03013 | Nucleocytoplasmic transport                               | 2/308 | 0.96823632820802  |
| hsa01240 | Biosynthesis of cofactors                                 | 2/308 | 0.994898346758353 |
| hsa04740 | Olfactory transduction                                    | 2/308 | 0.999998748277511 |
| hsa03265 | Virion - Ebolavirus, Lyssavirus and Morbillivirus         | 1/308 | 0.503824298752738 |
| hsa03450 | Non-homologous end-joining                                | 1/308 | 0.53106950690357  |
| hsa00604 | Glycosphingolipid biosynthesis - ganglio series           | 1/308 | 0.583627428146345 |
| hsa00450 | Selenocompound metabolism                                 | 1/308 | 0.630404928481569 |
| hsa00061 | Fatty acid biosynthesis                                   | 1/308 | 0.653514256638217 |
| hsa00100 | Steroid biosynthesis                                      | 1/308 | 0.685599905210756 |
| hsa00670 | One carbon pool by folate                                 | 1/308 | 0.685599905210756 |
| hsa00062 | Fatty acid elongation                                     | 1/308 | 0.798921954665739 |
| hsa00650 | Butanoate metabolism                                      | 1/308 | 0.798921954665739 |
| hsa01040 | Biosynthesis of unsaturated fatty acids                   | 1/308 | 0.798921954665739 |
| hsa04966 | Collecting duct acid secretion                            | 1/308 | 0.812275546321424 |
| hsa00020 | Citrate cycle (TCA cycle)                                 | 1/308 | 0.828084542483679 |
| hsa03060 | Protein export                                            | 1/308 | 0.828084542483679 |
| hsa05310 | Asthma                                                    | 1/308 | 0.828084542483679 |
| hsa04710 | Circadian rhythm                                          | 1/308 | 0.861726215001291 |
| hsa00250 | Alanine, aspartate and glutamate metabolism               | 1/308 | 0.8906052555657   |
| hsa01250 | Biosynthesis of nucleotide sugars                         | 1/308 | 0.8906052555657   |
| hsa00380 | Tryptophan metabolism                                     | 1/308 | 0.926786222265233 |
| hsa04216 | Ferroptosis                                               | 1/308 | 0.926786222265233 |
| hsa00071 | Fatty acid degradation                                    | 1/308 | 0.931954525332168 |
| hsa03022 | Basal transcription factors                               | 1/308 | 0.93267148689231  |
| hsa02010 | ABC transporters                                          | 1/308 | 0.936765990237965 |
| hsa00514 | Other types of O-glycan biosynthesis                      | 1/308 | 0.936765990237965 |
| hsa00620 | Pyruvate metabolism                                       | 1/308 | 0.936765990237965 |
| hsa00330 | Arginine and proline metabolism                           | 1/308 | 0.947440322539008 |
| hsa00520 | Amino sugar and nucleotide sugar metabolism               | 1/308 | 0.947440322539008 |
| hsa04979 | Cholesterol metabolism                                    | 1/308 | 0.947440322539008 |
| hsa05110 | Vibrio cholerae infection                                 | 1/308 | 0.947440322539008 |
| hsa04961 | Endocrine and other factor-regulated calcium reabsorption | 1/308 | 0.950272649906944 |
| hsa00240 | Pyrimidine metabolism                                     | 1/308 | 0.960641796636103 |
| hsa05217 | Basal cell carcinoma                                      | 1/308 | 0.96823632820802  |
| hsa00970 | Aminoacyl-tRNA biosynthesis                               | 1/308 | 0.96823632820802  |

|          |                                     |       |                   |
|----------|-------------------------------------|-------|-------------------|
| hsa00830 | Retinol metabolism                  | 1/308 | 0.970148648905017 |
| hsa01230 | Biosynthesis of amino acids         | 1/308 | 0.981475548710786 |
| hsa03018 | RNA degradation                     | 1/308 | 0.981475548710786 |
| hsa04612 | Antigen processing and presentation | 1/308 | 0.981475548710786 |
| hsa00983 | Drug metabolism - other enzymes     | 1/308 | 0.981475548710786 |
| hsa04146 | Peroxisome                          | 1/308 | 0.981475548710786 |
| hsa01232 | Nucleotide metabolism               | 1/308 | 0.981475548710786 |
| hsa04976 | Bile secretion                      | 1/308 | 0.985791234065261 |
| hsa04974 | Protein digestion and absorption    | 1/308 | 0.995302208283966 |
| hsa01200 | Carbon metabolism                   | 1/308 | 0.996011623595077 |
| hsa03082 | ATP-dependent chromatin remodeling  | 1/308 | 0.996011623595077 |
| hsa04142 | Lysosome                            | 1/308 | 0.998645558504815 |
